# Supplementary material for: Lamin A tail modification by SUMO1 is disrupted by familial partial lipodystrophy–causing mutations
Source: PubMed Central journal article supplement — Mol Biol Cell. 2013 Feb 1;24(3):342–50. doi: 10.1091/mbc.E12-07-0527 (PMC3564541; doi:10.1091/mbc.e12-07-0527), 2013-02-01
Supplement: supp_E12-07-0527v1_CombinedSupMats.pdf [file supp_E12-07-0527v1_CombinedSupMats.pdf]

**Supplemental Table 1. List of mutagenesis primers used.**

| <b>Mutation</b>         | <b>Sense primer 5'-&gt;3'</b>           | <b>Antisense primer 5'-&gt;3'</b>       |
|-------------------------|-----------------------------------------|-----------------------------------------|
| <b>K420R</b>            | AGCGTCACCAAAAAGCGCAGACTGGAGTC<br>CACT   | AGTGGACTCCAGTCTGCGCTTTTGGTGAC<br>GCT    |
| <b>K486R</b>            | CCGGTTCCCACCAAGGTTACCCTGAAGG            | CCTTCAGGGTGAACCTTGGTGGGAACCGG           |
| <b>K490R</b>            | CCACCAAAGTTCACCCTGAGGGCTGGGCA<br>G      | CTGCCAGCCCTCAGGGTGAACCTTGGTG<br>G       |
| <b>K515R</b>            | CCGACCTGGTGTGGAGGGCACAGAACAC            | GTGTTCTGTGCCCTCCACACCAGGTCCG            |
| <b>R439C</b>            | GCACTAGCGGGTGCGTGGCCGTG                 | CACGGCCACGCACCCGCTAGTGC                 |
| <b>G465D</b>            | GAGGACCAGTCCATGGACAATTGGCAGAT<br>CAAG   | CTTGATCTGCCAATTGTCCATGGACTGGTC<br>CTC   |
| <b>R482W</b>            | ATCCCTTGCTGACTTACTGGTTCCCACCAA<br>AGTTC | GAACCTTGGTGGGAACCAGTAAGTCAGCA<br>AGGGAT |
| <b>E460A</b>            | GCAACAAGTCCAATGCGGACCAGTCCATG<br>GG     | CCCATGGACTGGTCCGCATTGGACTTGT<br>GC      |
| <b>D461A</b>            | CAACAAGTCCAATGAGGCCAGTCCATGG<br>GCAATT  | AATTGCCCATGGACTGGGCCTCATTGGAC<br>TTGTTG |
| <b>E460A/<br/>D461A</b> | CGCAACAAGTCCAATGCGGCCAGTCCATG<br>GGCAAT | ATTGCCCATGGACTGGGCCGCATTGGACT<br>TGTGCG |
| <b>E536A</b>            | CAACTCCACTGGGGCAGAAGTGGCCATGC           | GCATGGCCACTTCTGCCCCAGTGGAGTTG           |
| <b>E537A</b>            | TCCACTGGGGAAGCAGTGGCCATGCGC             | GCGCATGGCCACTGCTCCCCAGTGGA              |
| <b>E536A/<br/>E537A</b> | CAACTCCACTGGGGCAGCAGTGGCCATGC<br>GCA    | TGCGCATGGCCACTGCTCCCCAGTGGAG<br>TTG     |
